# Supplementary material for: Durable and thermally switchable polysilsesquioxane adhesives via dynamic covalent bonds: effect of a crosslinker on reversible chemistry
Source: Royal Society of Chemistry journal article supplement (doi:10.1039/d2qm01155g), 2023-01-01
Supplement: d2qm01155g1.pdf [file d2qm01155g1.pdf]

Supplementary Information for:

## **Durable and Thermally Switchable Polysilsesquioxane Adhesive via Dynamic Covalent Bond: Effect of Crosslinker on Reversible Chemistry**

Seung Hyun Kang <sup>a,b,1</sup>, Jin Young Seo <sup>a,1</sup>, Hyeon Ji Oh <sup>a</sup>, Jung-Hyun Lee <sup>b</sup>, Albert S. Lee <sup>a</sup>, and Kyung-Youl Baek <sup>a,c,d,\*</sup>

<sup>a</sup> Materials Architecturing Research Center, Korea Institute of Science and Technology, Seoul 02792, Republic of Korea.

<sup>b</sup> Department of Chemical and Biological Engineering, Korea University, Seoul 02481, Republic of Korea.

<sup>c</sup> Division of Nano & Information Technology, KIST School, Korea University of Science and Technology, Seoul 02792, Republic of Korea.

<sup>d</sup> KHU-KIST Department of Converging Science and Technology, Kyung Hee University, Seoul 02447, Republic of Korea.

<sup>1</sup> These authors contributed equally to this work.

Corresponding Author's e-mail: [baek@kist.re.kr](mailto:baek@kist.re.kr) (K.-Y. Baek)

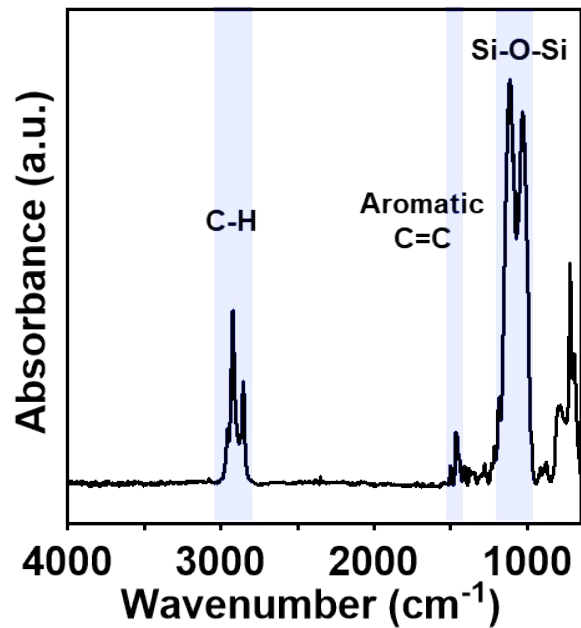

**Figure S1.** FT-IR spectrum of ladder-like poly(silsesquioxane) with octyl and pyrrole functional groups.

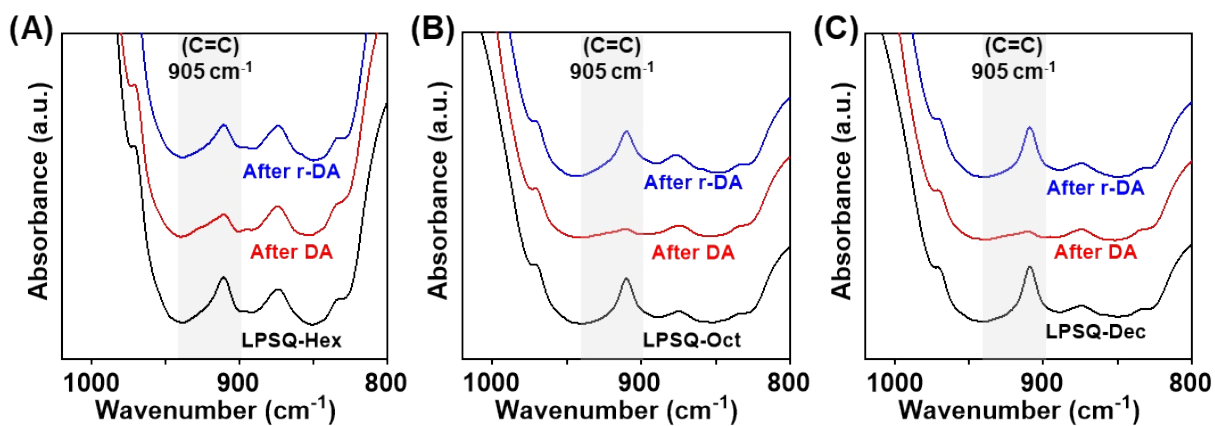

**Figure S2.** FT-IR spectra of (A) LPSQ-Hex, (B) LPSQ-Oct, (C) LPSQ-Dec before and after thermal annealing. (DA reaction and rDA reaction were performed at 90 °C and 135 °C respectively)

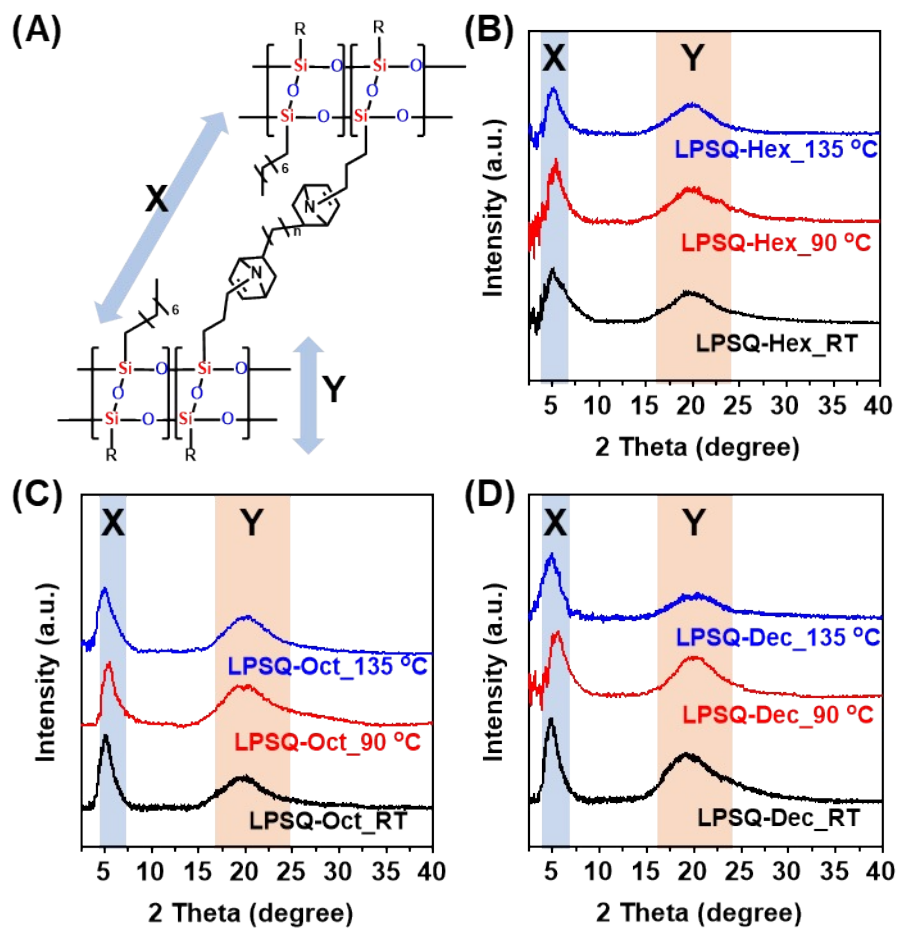

**Figure S3.** (A) Chemical structure of crosslinked LPSQ adhesives, XRD patterns of (B) LPSQ-Hex, (C) LPSQ-Oct, (D) LPSQ-Dec before and after thermal annealing (DA reaction and rDA reaction were performed at 90 °C and 135 °C respectively.)

**Table S1.** Molar volume calculation of LPSQ adhesives by Bondi's group contribution method.

|               | Group              | $V_w$ (cm <sup>3</sup> /mol) | Frequency |    |    | Total $V_w$ (cm <sup>3</sup> /mol) |       |        |
|---------------|--------------------|------------------------------|-----------|----|----|------------------------------------|-------|--------|
| Octyl group   | Si (Tetravalent)   | 16.6                         | 2         |    |    | 33.2                               |       |        |
|               | -O-                | 5.5                          | 3         |    |    | 16.5                               |       |        |
|               | -CH <sub>2</sub> - | 10.23                        | 14        |    |    | 143.22                             |       |        |
|               | -CH <sub>3</sub>   | 13.67                        | 2         |    |    | 27.34                              |       |        |
| Pyrrole group | Si (Tetravalent)   | 16.6                         | 2         |    |    | 33.2                               |       |        |
|               | -O-                | 5.5                          | 3         |    |    | 16.5                               |       |        |
|               | -CH <sub>2</sub> - | 10.23                        | 8         | 10 | 12 | 81.84                              | 102.3 | 122.76 |
|               | -N< (Trivalent)    | 4.3                          | 2         |    |    | 8.6                                |       |        |
|               | Cyclohexene        | 53.36                        | 2         |    |    | 106.72                             |       |        |

**Table S2.** Polymer-solvent interaction parameter calculation of LPSQ adhesives using Hansen solubility parameter.

| Entry | Sample   | Solubility parameter (MPa <sup>0.5</sup> ) <sup>a</sup> |            |            | Distance (MPa <sup>0.5</sup> ) <sup>b</sup> | $\chi$ |
|-------|----------|---------------------------------------------------------|------------|------------|---------------------------------------------|--------|
|       |          | $\delta_d$                                              | $\delta_p$ | $\delta_h$ |                                             |        |
| 1     | LPSQ-Hex | 17.706                                                  | 1.425      | 5.084      | 3.14                                        | 0.322  |
| 2     | LPSQ-Oct | 17.712                                                  | 1.399      | 5.038      | 3.092                                       | 0.319  |
| 3     | LPSQ-Dec | 17.725                                                  | 1.375      | 4.993      | 3.043                                       | 0.313  |

<sup>a</sup> Hansen solubility parameter was calculated by Hoftzyer-Van Krevelen method (solubility parameter components could be predicted from group contributions); <sup>b</sup> Distance between points in Hansen space

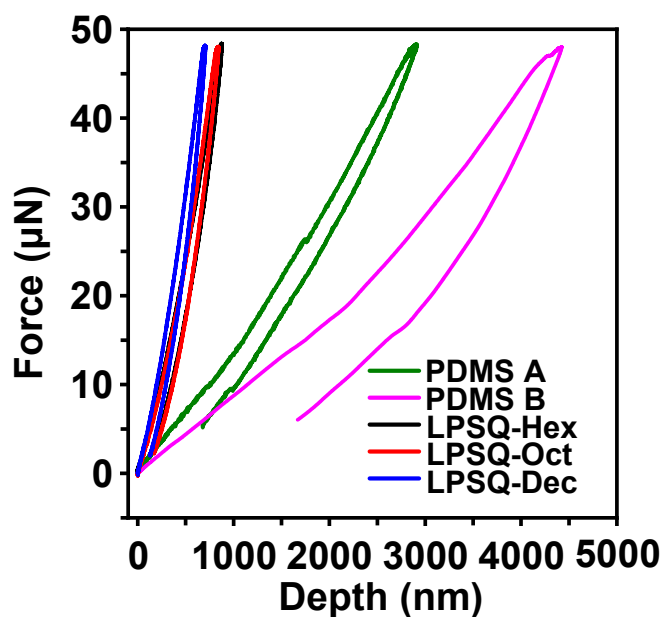

**Figure S4.** Force and depth profiles of PDMS and LPSQ adhesives measured by nano-indentation.
